# Supplementary material
Source: PubMed Central journal article supplement (PMC3401380)

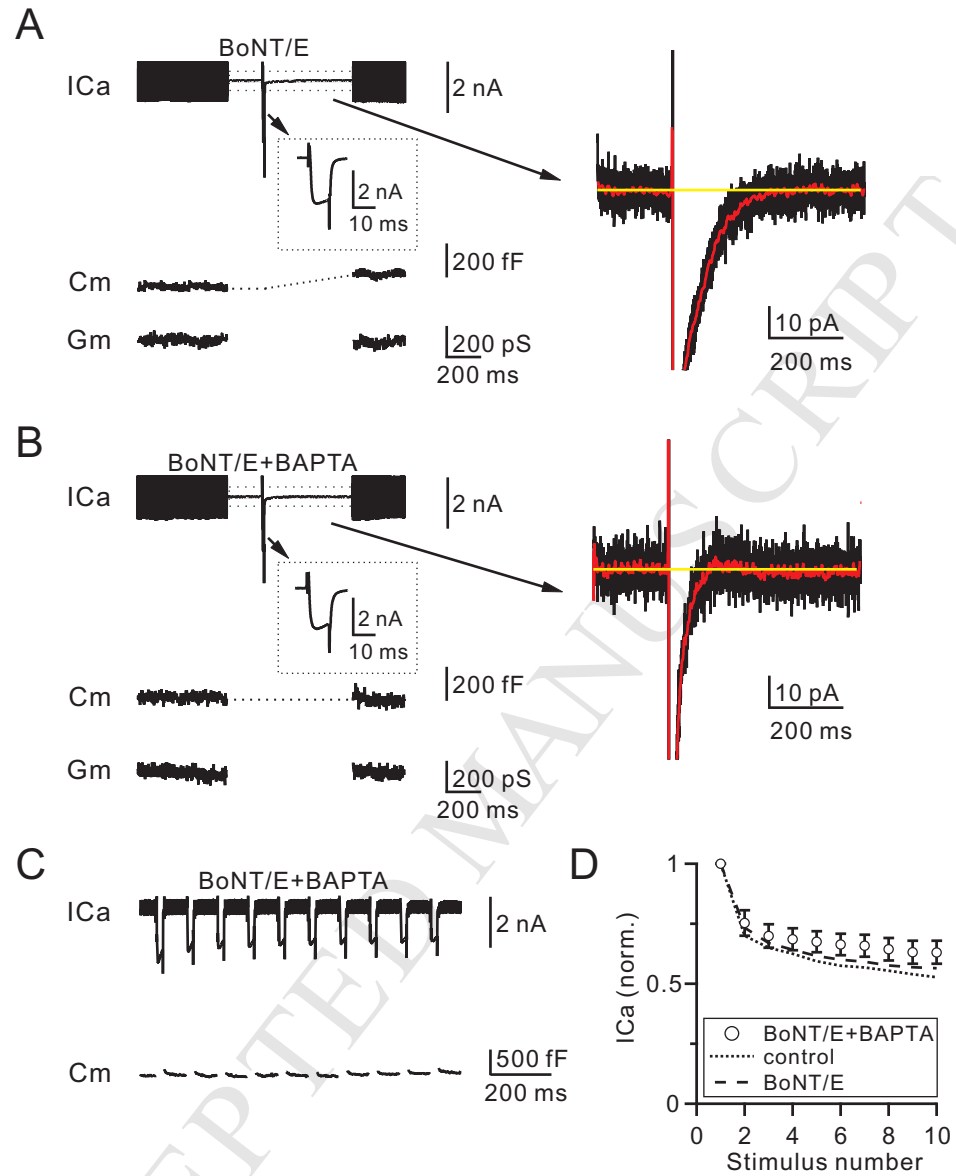

Figure S1

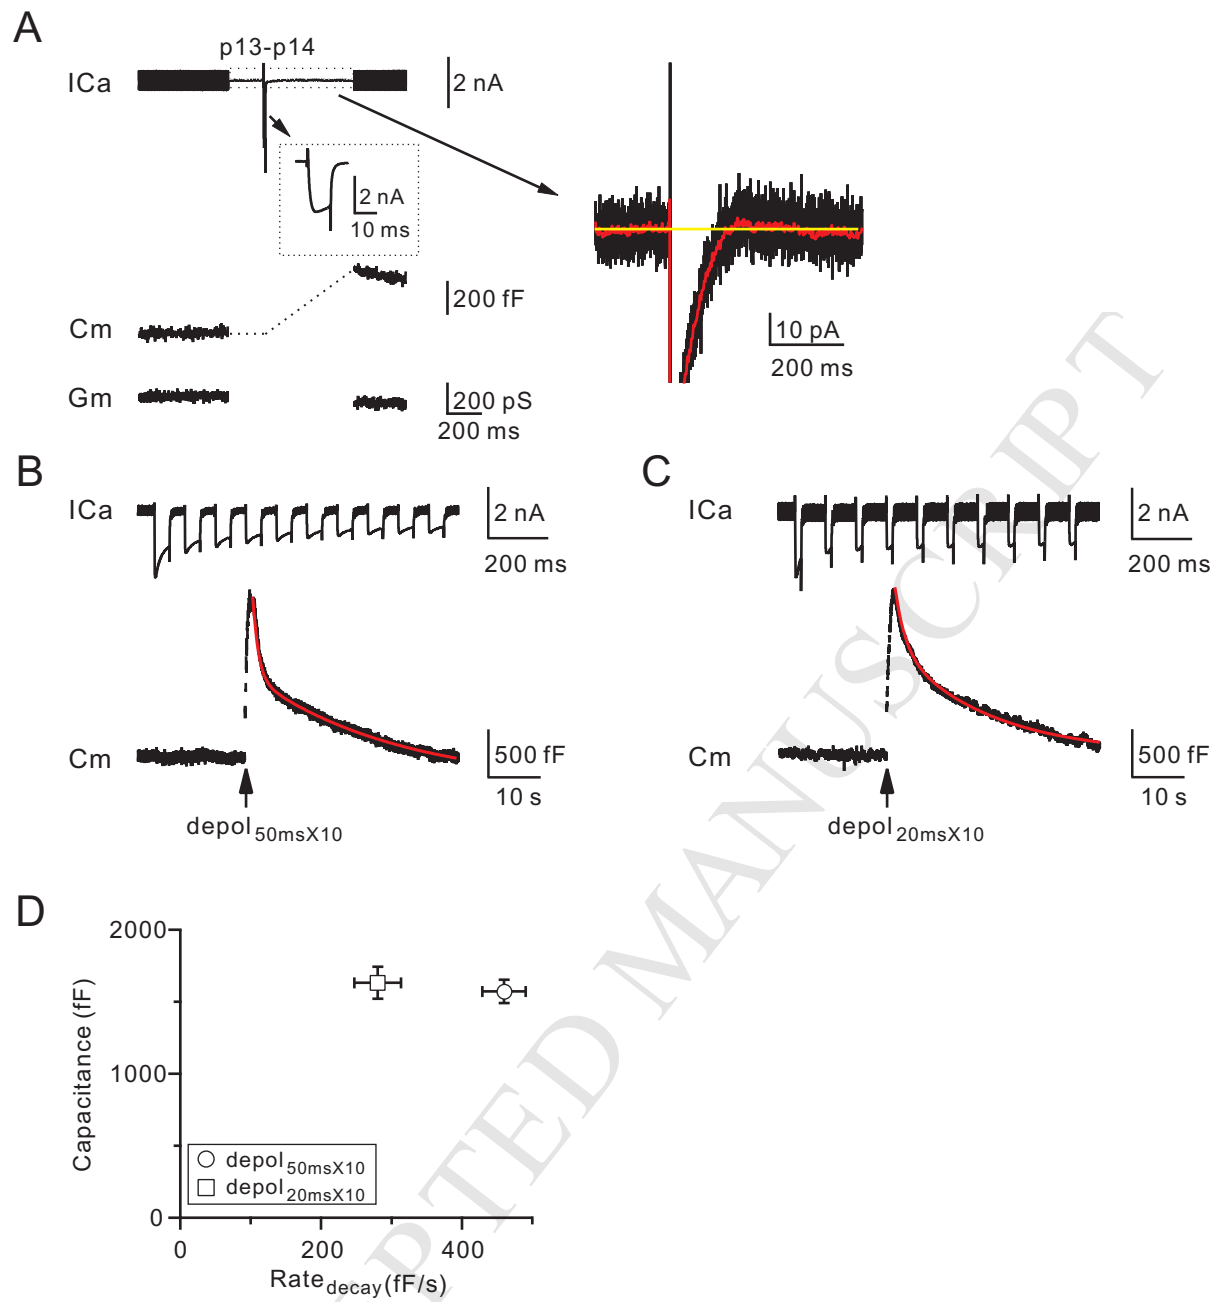

Figure S2

Supplement: NIHMS375033-supplement-supplement_1.pdf [file NIHMS375033-supplement-supplement_1.pdf]
